# Supplementary material for: Tacticity control approached by electric-field assisted free radical polymerization – the case of sterically hindered monomers
Source: Royal Society of Chemistry journal article supplement (doi:10.1039/d3py00484h), 2023-01-01
Supplement: d3py00484h1.pdf [file d3py00484h1.pdf]

## Supporting Information

# Tacticity control approached by electric-field assisted free radical polymerization - the case of sterically hindered monomers

Wenkang Tu,<sup>a,b,c</sup> Paulina Maksym,<sup>b,d</sup> Katarzyna Chat,<sup>a,b</sup> Tadeusz Biela,<sup>e</sup> Andrzej Zięba,<sup>f</sup> Kamil Kaminski,<sup>a,b</sup> and Karolina Adrjanowicz <sup>\*a,b</sup>

<sup>a</sup>*Institute of Physics, University of Silesia, 75 Pulku Piechoty 1, 41-500 Chorzow, Poland.*

<sup>\*</sup>*e-mail: kadrjano@us.edu.pl*

<sup>b</sup>*Silesian Center for Education and Interdisciplinary Research (SMCEBI), 75 Pulku Piechoty 1a, 41-500 Chorzow, Poland*

<sup>c</sup>*College of Mechatronics and Control Engineering, Shenzhen University, Shenzhen 518060, China*

<sup>d</sup>*Institute of Materials Engineering, University of Silesia, 75 Pulku Piechoty 1a, 41- 500 Chorzow, Poland*

<sup>e</sup>*Department of Polymer Chemistry, Centre of Molecular and Macromolecular Studies, Polish Academy of Sciences, Sienkiewicza 112, 90-363, Lodz, Poland*

<sup>f</sup>*Department of Organic Chemistry, School of Pharmacy with the Division of Laboratory Medicine in Sosnowiec, Medical University of Silesia in Katowice, ul. Jagiellońska 4, 41-200 Sosnowiec, Poland*

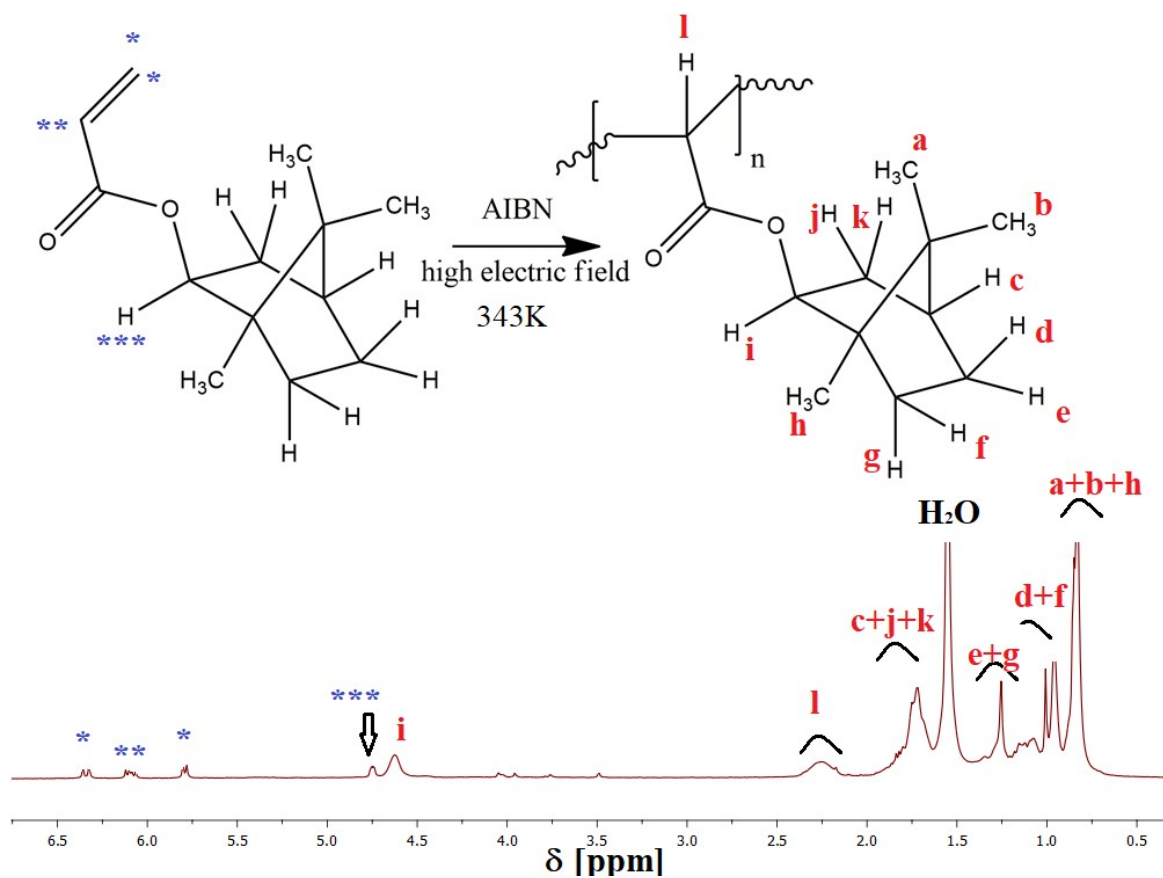

Figure S1.  $^1\text{H}$  NMR spectrum of the polymerization mixture (600 MHz,  $\text{CDCl}_3$ ).

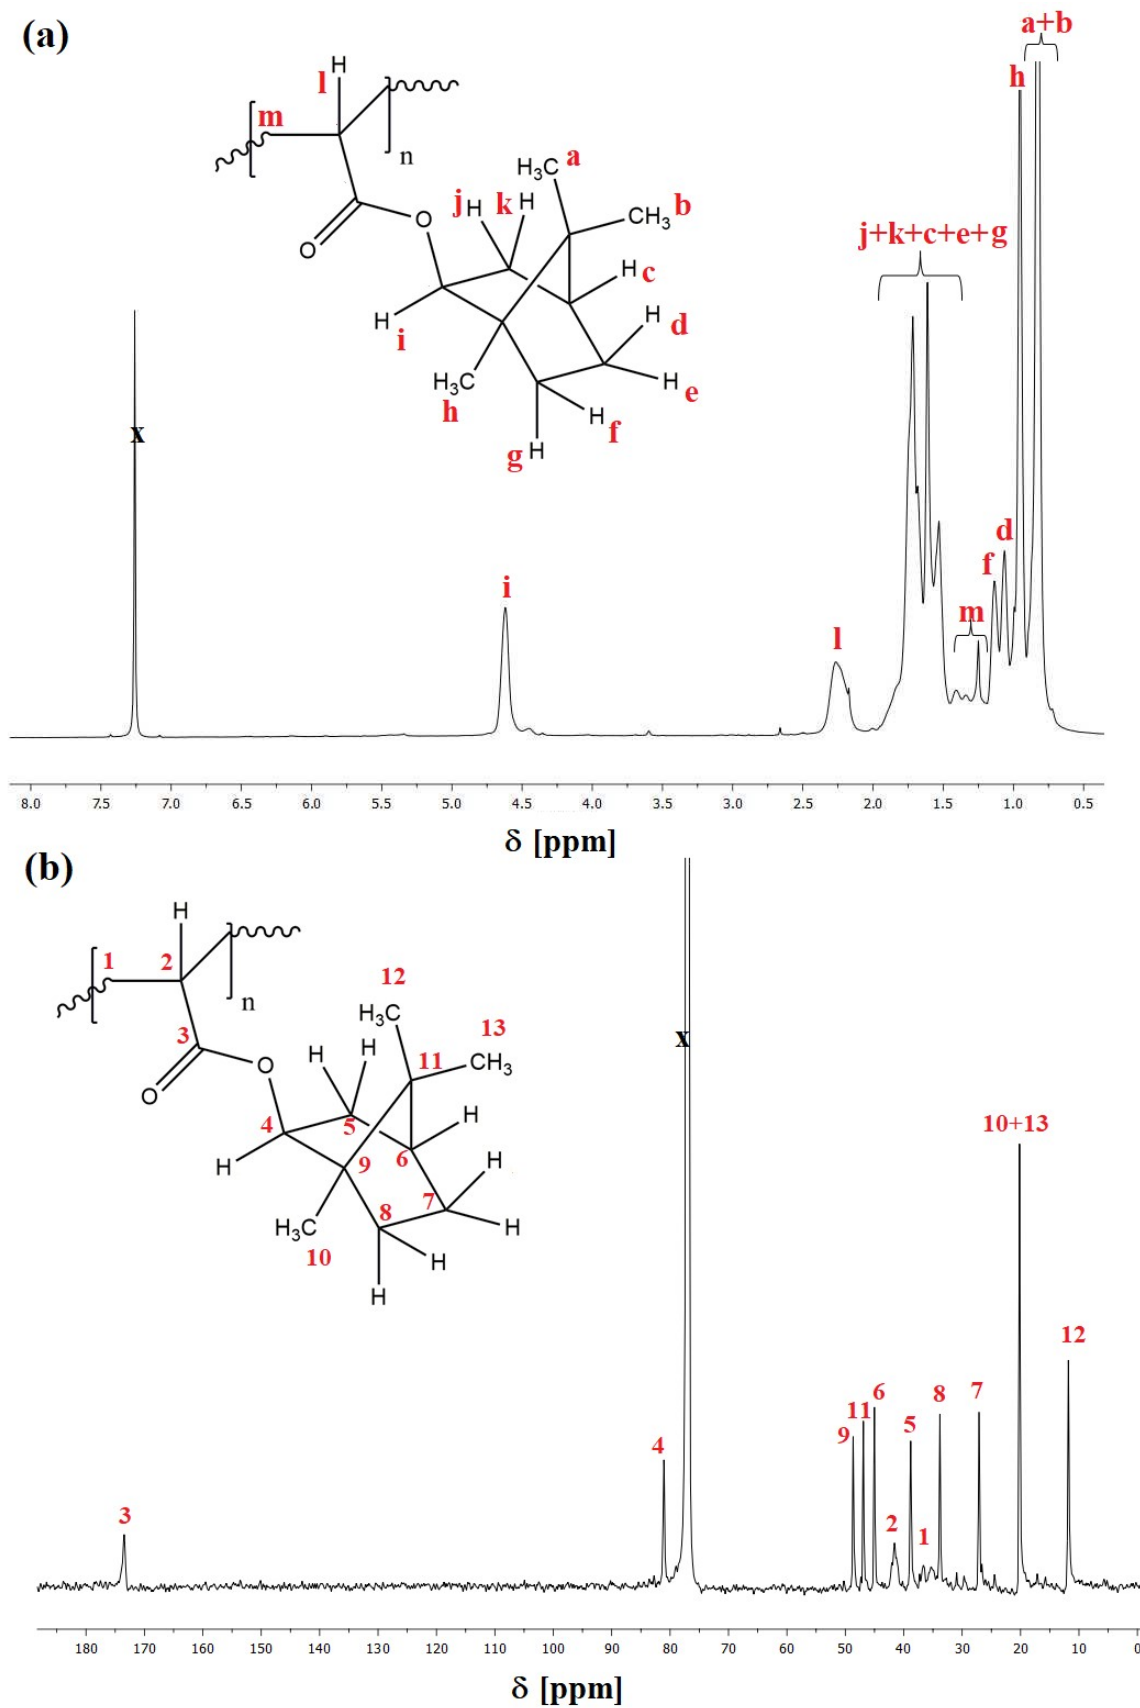

Figure S2. Representative  $^1\text{H}$  NMR (a) and  $^{13}\text{C}$  NMR (b) spectra of PIBA samples produced via field assisted FRP.

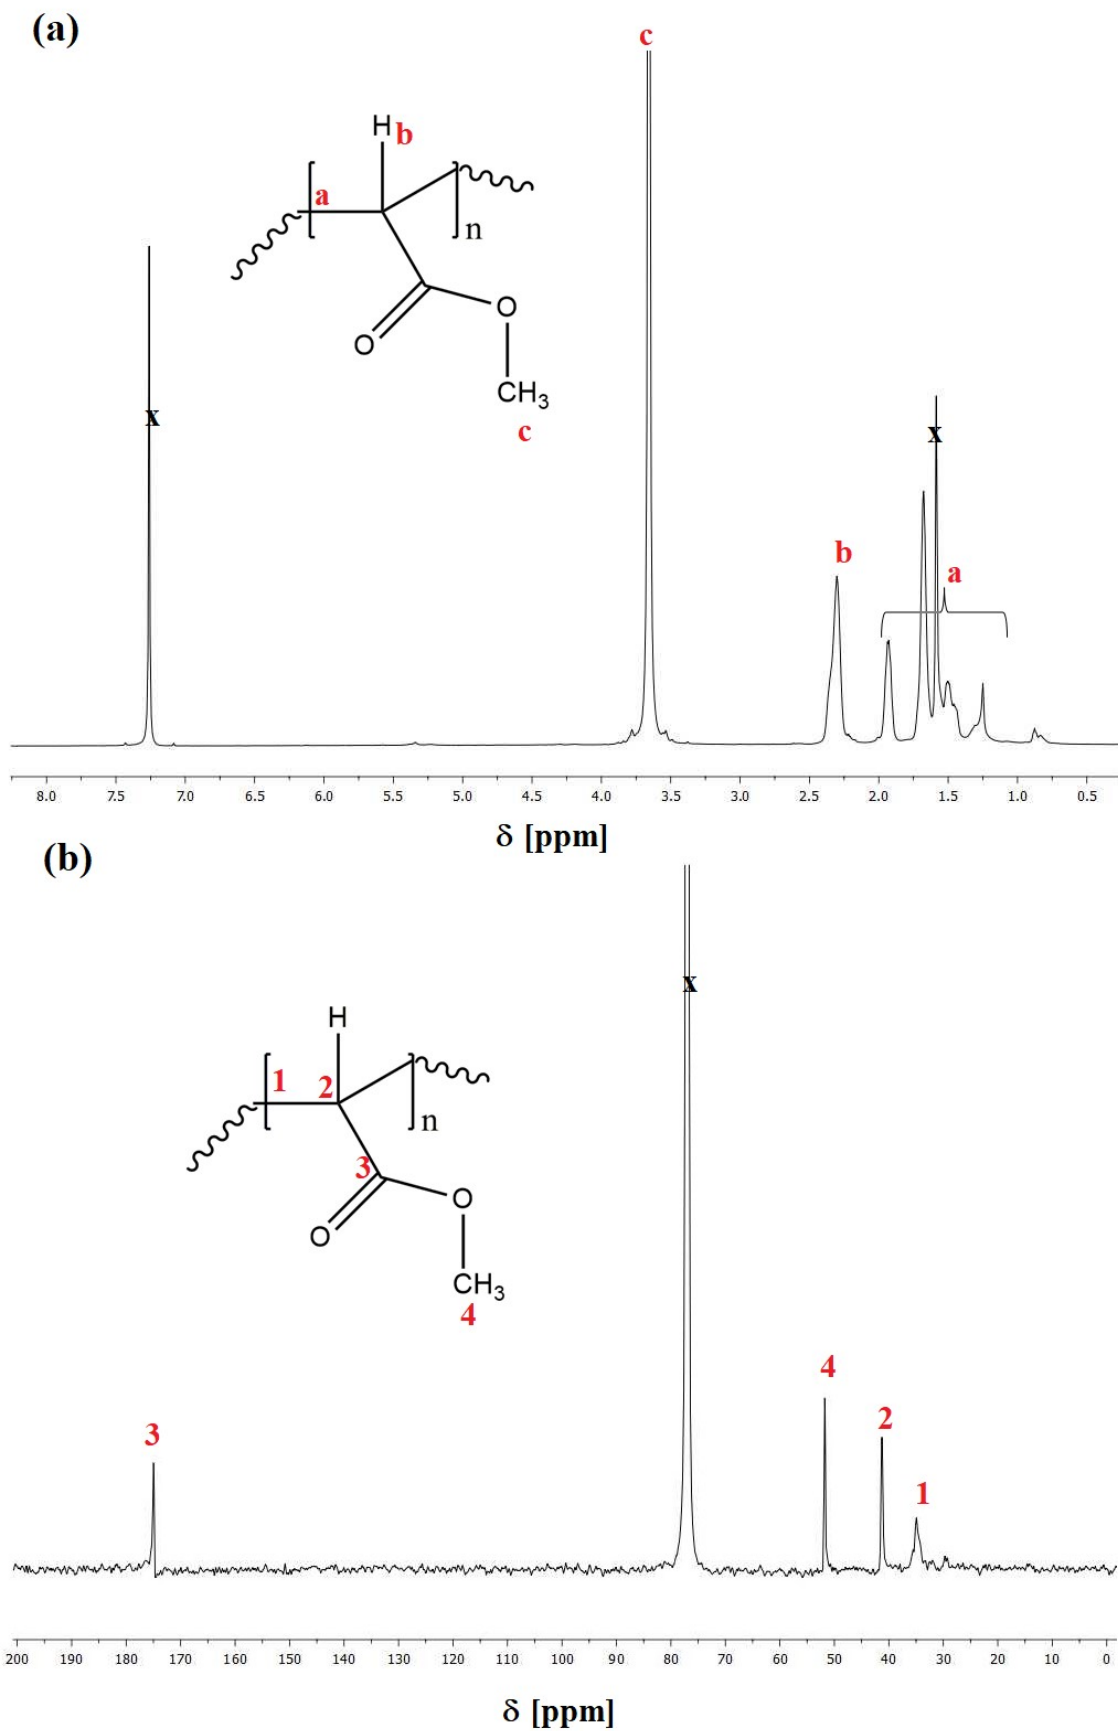

Figure S3. Representative  $^1\text{H}$  NMR (a) and  $^{13}\text{C}$  NMR (b) spectra of PMA samples produced via FRP.

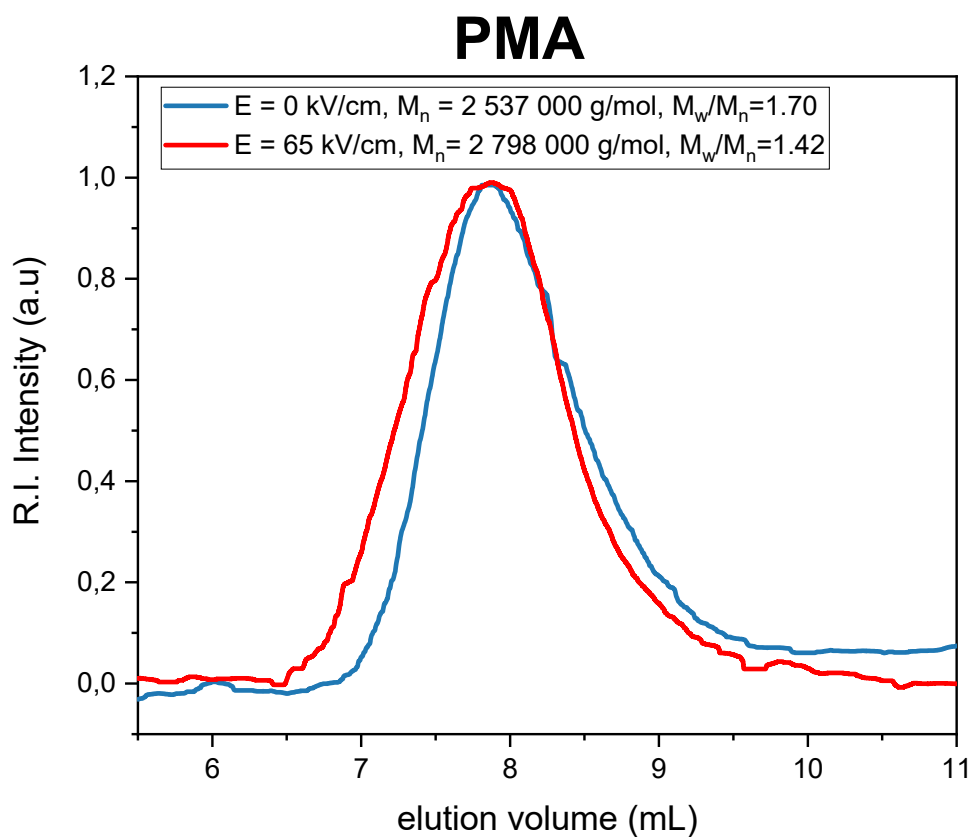

Figure S4. SEC-LALLS trace of poly(methyl acrylate) obtained via FRP in the presence and absence of high electric field.

Table S1. Characteristics of PMA obtained by FRP in the presence and the absence of high electric field

| Electric field [kV/cm] | $\alpha$ [%] <sup>a</sup> | $M_n$ [g/mol] <sup>b</sup> | $M_w$ [g/mol] | $\mathcal{D}^b$ | $dn/dc$ |
|------------------------|---------------------------|----------------------------|---------------|-----------------|---------|
| 0                      | >99                       | 2 537 000                  | 5 374 100     | 1.70            | 0.012   |
| 65                     | >99                       | 2 798 000                  | 3 973 160     | 1.42            | 0.019   |

<sup>a</sup>determined by  $^1\text{H}$  NMR after 4h; <sup>b</sup>determined by SEC-LALLS (DMF, 10 mM LiBr)

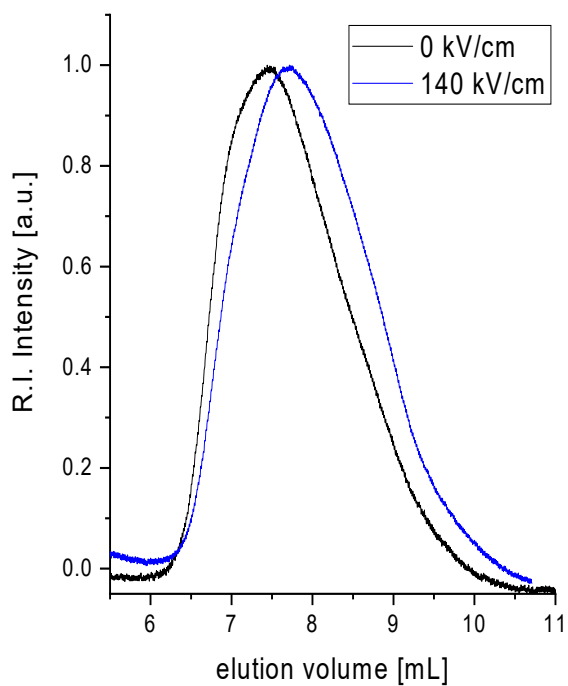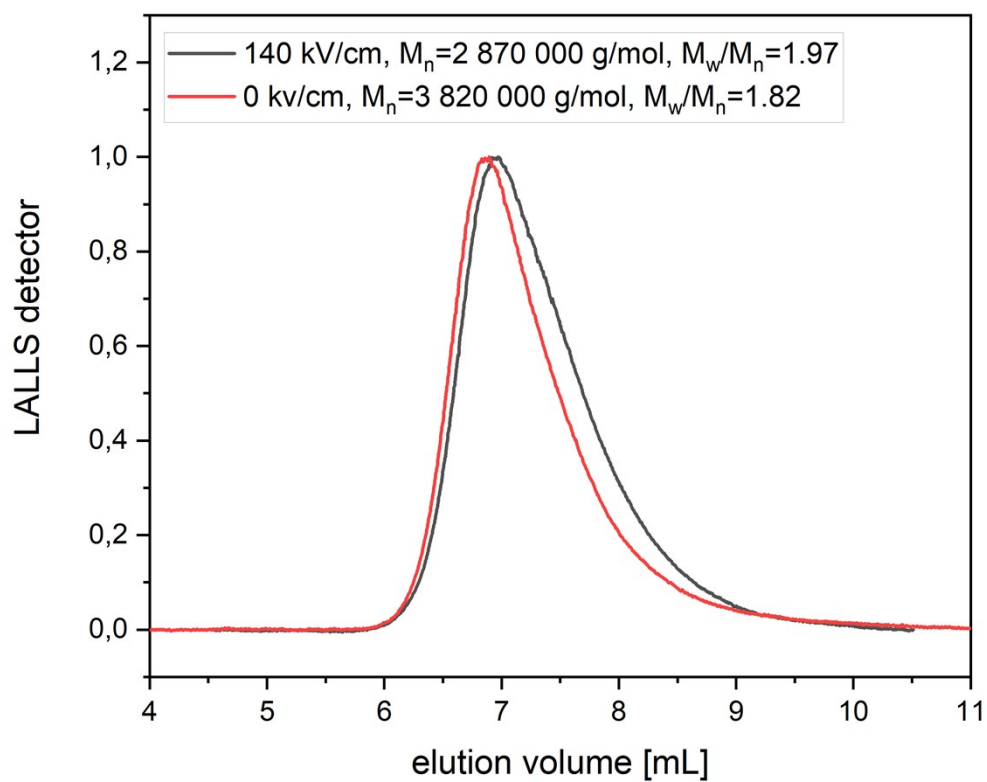

Figure S5. SEC-LALLS traces of poly(*n*-butyl acrylate) obtained via FRP in the presence and absence of high electric field.

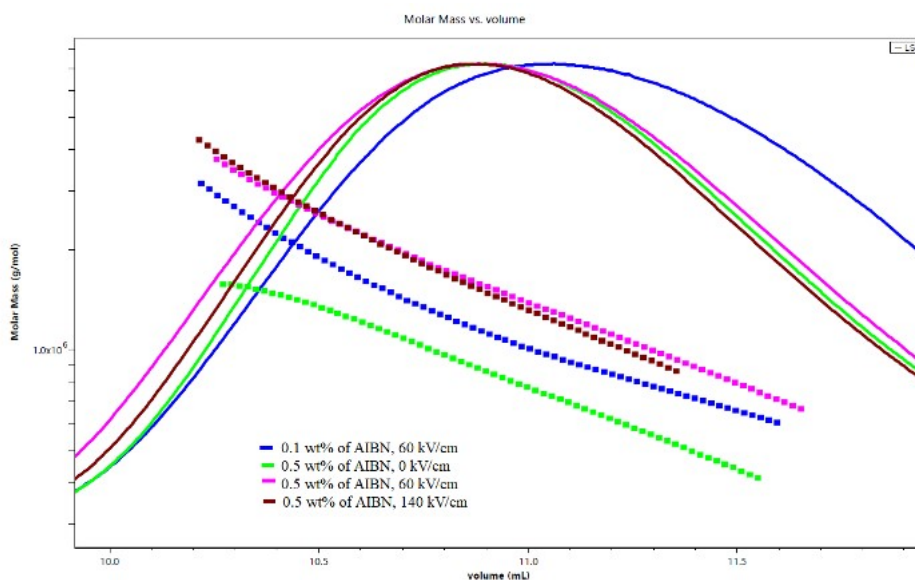

Figure S6 The relationship between elution time (retention time) and the molecular weight determined from SEC-MALLS of PIBA samples obtained at 343 K at different DC field magnitudes. Original SEC-MALLS traces are shown as well.

**Figure S6** presents the corresponding relationship between the molar mass of PIBAs and the elution volume (with the third axis representing the intensity of the chromatographic peak). For a fixed elution volume, the molecular weight increases with DC-field magnitude but decreases with the concentration of the initiator (straight lines in **Figure S6**). Additionally, we found that for the samples obtained at 60 kV/cm and 140 kV/cm with 0.5wt% of AIBN concentration (green and brown lines), the dependence of the molecular weight is almost the same. This indicates a saturation effect, so going further with the field magnitude does not produce a more pronounced effect. Interestingly, we also note wt% concentrations of AIBN affect the dependence between molecular weight and elution volume for PIBA obtained at 60 kV/cm.
